# Supplementary material for: Assembling highly efficient X-ray and UV-visible light detectors using a VS2–MoS2 and VS2–WS2 hybrid composite-embedded perovskite layer
Source: Royal Society of Chemistry journal article supplement (doi:10.1039/d4ta01644k), 2024-01-01
Supplement: d4ta01644k1.pdf [file d4ta01644k1.pdf]

## Supporting Information

# Assembling highly efficient X-ray and UV-visible light detectors using a VS<sub>2</sub>–MoS<sub>2</sub> and VS<sub>2</sub>–WS<sub>2</sub> hybrid composite-embedded perovskite layer

Dhanasekaran Vikraman<sup>a</sup>, Hailiang Liu<sup>b</sup>, Syed Hassan Abbas Jaffery<sup>c,d</sup>, Sajjad Hussain<sup>c,d</sup>, K. Karuppasamy<sup>e,f</sup>, Duhee Lee<sup>a</sup>, Jungwon Kang<sup>b</sup>, Jongwan Jung<sup>c,d</sup>, Hyun-Seok Kim<sup>a\*</sup>

<sup>a</sup> Division of Electronics and Electrical Engineering, Dongguk University-Seoul, Seoul 04620, Republic of Korea.

<sup>b</sup> Convergence Semiconductor Research Center, Department of Electronics and Electrical Engineering, Dankook University, Yongin 16890, Republic of Korea.

<sup>c</sup> Hybrid Materials Center (HMC), Sejong University, Seoul 05006, Republic of Korea.

<sup>d</sup> Department of Nanotechnology and Advanced Materials Engineering, Sejong University, Seoul 05006, Republic of Korea.

<sup>e</sup> Department of Chemical and Petroleum Engineering, Khalifa University of Science and Technology, Abu Dhabi, 127788, United Arab Emirates

<sup>f</sup> Emirates Nuclear Technology Center (ENTC), Khalifa University of Science and Technology, Abu Dhabi, 127788, United Arab Emirates

\* Corresponding author's Email: [hyunseokk@dongguk.edu](mailto:hyunseokk@dongguk.edu)

### *S1. Synthesis of MoS<sub>2</sub>, WS<sub>2</sub> and VS<sub>2</sub>*

Simple hydrothermal process was utilized to assemble the MoS<sub>2</sub> nanostructures. The precursors, 0.2 g of ammonium molybdate ((NH<sub>4</sub>)<sub>6</sub>Mo<sub>7</sub>O<sub>24</sub>·4H<sub>2</sub>O) and 1.15 g thiourea (CH<sub>4</sub>N<sub>2</sub>S) were dissolved in the 25 mL deionized water (DI), then blended under continuous stirring until transformed as a transparent solution. Subsequently, as prepared solution was transferred into 100 mL Teflon-lined stainless steel autoclave, heated at 220 °C for 20 h. After cooling naturally to room temperature, the product was flushed with DI and ethanol for several times and dried at 80 °C in vacuum for 12 h.

For WS<sub>2</sub> growth, 0.2 g of ammonium tungsten oxide hydrate (NH<sub>4</sub>)<sub>6</sub>H<sub>2</sub>W<sub>12</sub>O<sub>40</sub>·xH<sub>2</sub>O and 1.15 g of CH<sub>4</sub>N<sub>2</sub>S were dissolved in 25 ml of DI separately, then mixed under vigorous stirring to form a homogeneous solution. Meanwhile, oxalic acid dihydrate (H<sub>2</sub>C<sub>2</sub>O<sub>4</sub>·2H<sub>2</sub>O)

was added to the above solution as the catalyst with the pH adjusted at 2. As prepared solution was transferred into a 100 ml Teflon-lined stainless steel autoclave, reaction temperature fixed at 220 °C for 24 h, then naturally cooled down to room temperature. The above procedure was followed to clean and dry the nanopowders.

For VS<sub>2</sub> growth, 0.2 g of ammonium vanadate (NH<sub>4</sub>VO<sub>3</sub>) and 1.15 g of CH<sub>4</sub>N<sub>2</sub>S were dissolved in 2 ml of DI separately, then mixed under vigorous stirring to form a homogeneous solution. At the same time 2 ml ammonia water (NH<sub>3</sub>.H<sub>2</sub>O) was added slowly dropwise to get the uniform solution. After 60min vigorous stirring, the solution was placed in 100ml stainless steel lined Teflon auto-clave with temperature fixed at 220 °C for 24 h. The above procedure was followed to clean and dry the nanopowders.

## ***S2. Characterization***

The electronic configuration of nanostructures was characterized by Raman spectroscopy (Renishaw inVia RE04). Energy dispersive analysis combined JEOL JSM-6700F field emission scanning electron microscopy was used to analyze the morphological and compositional properties of synthesized hybrid nanostructures. X-ray photoelectron spectroscopy analysis was performed using PHI 5000 Versa Probe equipped with a monochromatic Al K $\alpha$  radiation source (25W, 6.7 $\times$ 10<sup>-8</sup> Pa). The surface topography of prepared active layers was measured using atomic force microscopy (Park Systems XE-150) operating in non-contact mode with 3  $\mu$ m  $\times$  3  $\mu$ m scan size. UV-vis optical spectroscopy (Optizen 2120UV) was used to measure the absorption spectra of active layer. Electrochemical impedance profiles were recorded using the PARSTAT 1000, PAR, USA.

To convert incident X-ray photons into visible photons, the proposed detector was joined with CsI (Tl) scintillators (Hamamatsu J13113) and the generated charge carriers during exposure were measured with the electrometer. The scintillator-coupled detector J-V

characteristics were recorded using an X-ray generator (AJEX 2000H). The distance between the X-ray source and the scintillator-coupled detector was about 30 cm, and the exposed X-ray dose was measured using an ion chamber (Capintec CII50) at the same distance. The constant 3.44 mGy of dose rate and -0.6 V of applied bias voltage for X-ray source were used for the all the measurement. To tune the charge-carrier collection, the bias voltage to the detector from -0.2 to -1.0V and dose rate from 1.19 to 5.56 mGy were applied. The operating conditions of X-ray generator were fixed at 1.57 sec, 80 kVp and 63 mA for X-ray exposure time, tube voltage and tube current, respectively for all the experiments. The collected current density (CCD) during the X-ray irradiation on-condition and the dark current density (DCD) during the X-ray irradiation off-condition were calculated by Equations (1), and (2), respectively. The sensitivity was calculated using Equation (3), which represented the generated current in proportion to the absorbed dose.

$$CCD \left[ \frac{\mu A}{cm^2} \right] = \frac{\text{Collected Current during X - ray ON}}{\text{Exposed Detection Area}} \quad (1)$$

$$DCD \left[ \frac{\mu A}{cm^2} \right] = \frac{\text{Collected Current during X - ray OFF}}{\text{Exposed Detection Area}} \quad (2)$$

$$\text{Sensitivity} \left[ \frac{\mu A}{mGy \cdot cm^2} \right] = \frac{CCD - DCD}{\text{Absorbed Dose}} \quad (3)$$

The absorbed dose from X-ray exposure was measured using an ion chamber.

The photodetector characteristics of prepared heterojunction devices were accomplished using a continuous wave laser beam with the different wavelength light source (365-740 nm) which was directly illumined on the device. The electrical outcomes were recorded at room temperature using a Keithley 4200A-SCS analyzer.

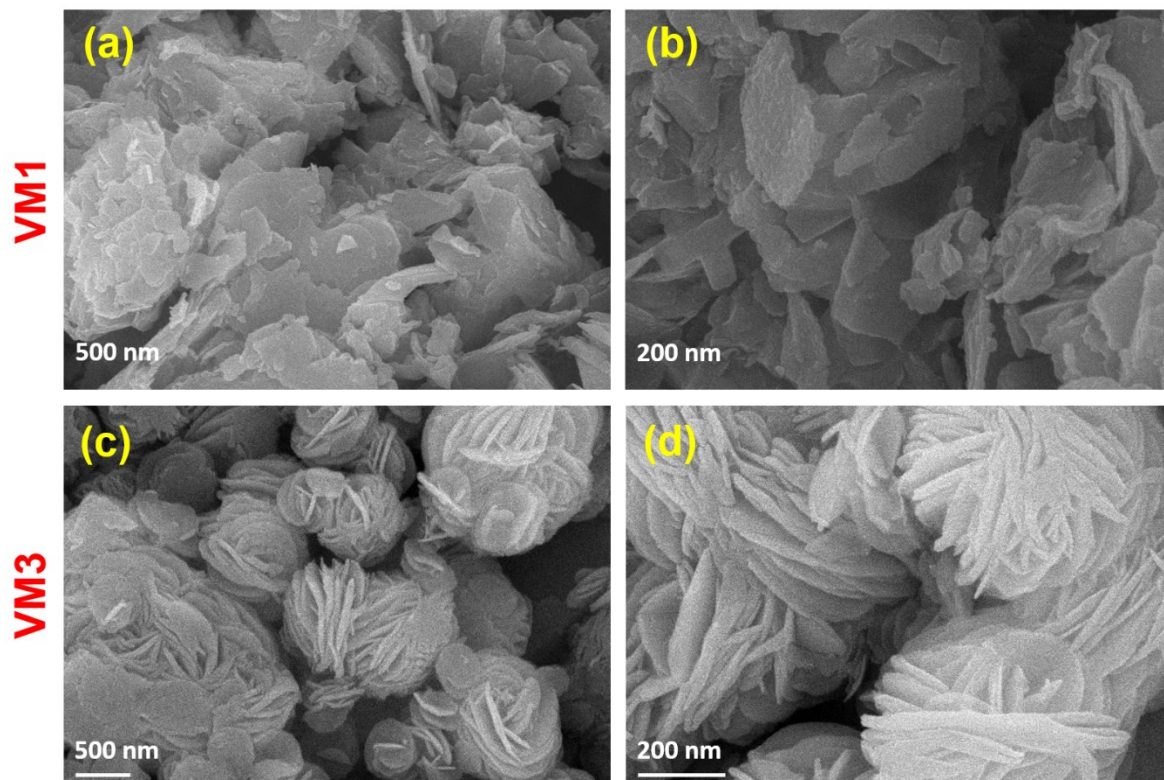

**Figure S1.** FESEM micrographs of (a-b) VM1 and (c-d) VM3 nanostructures

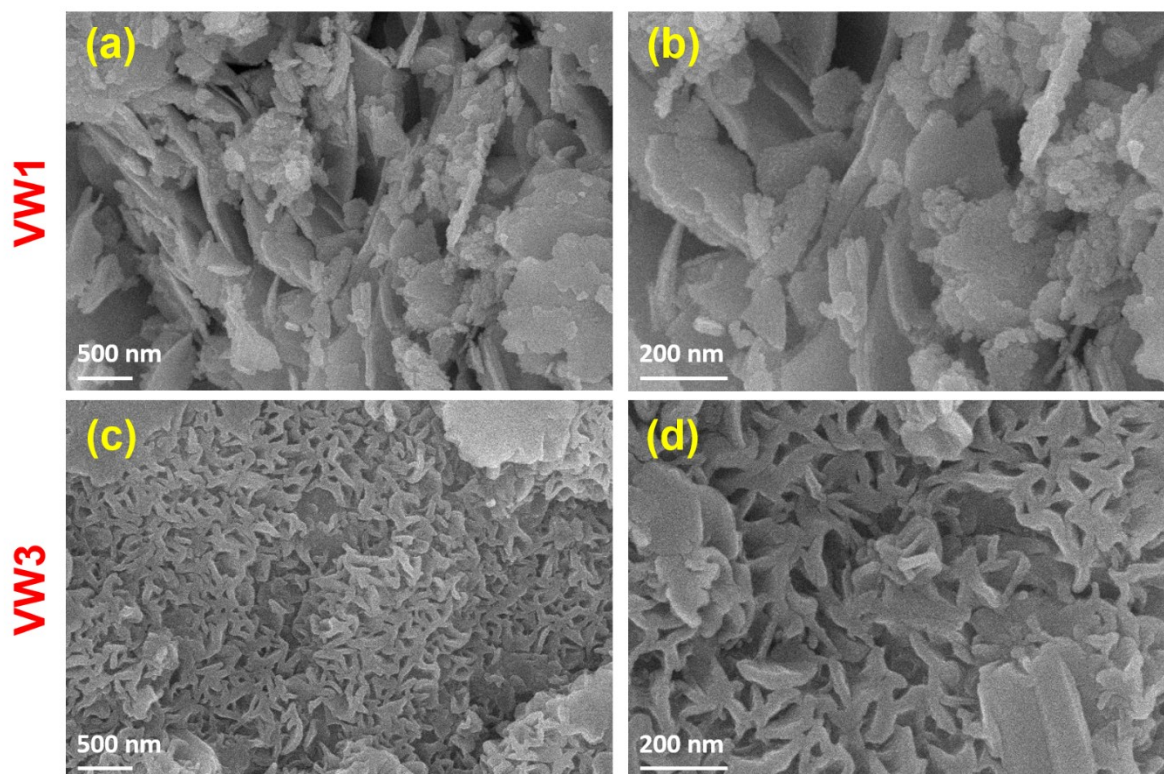

**Figure S2.** FESEM micrographs of (a-b) VW1 and (c-d) VW3 nanostructures

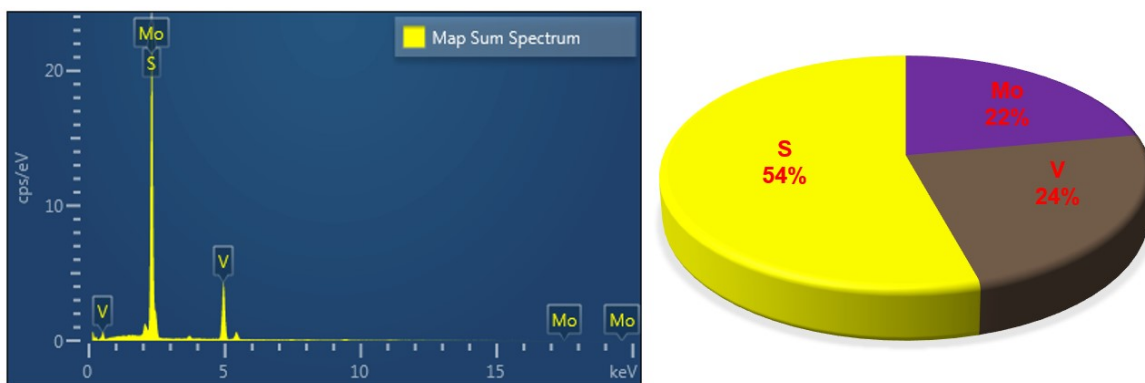

**Figure S3.** EDX profile of VM2 hybrid nanostructures.

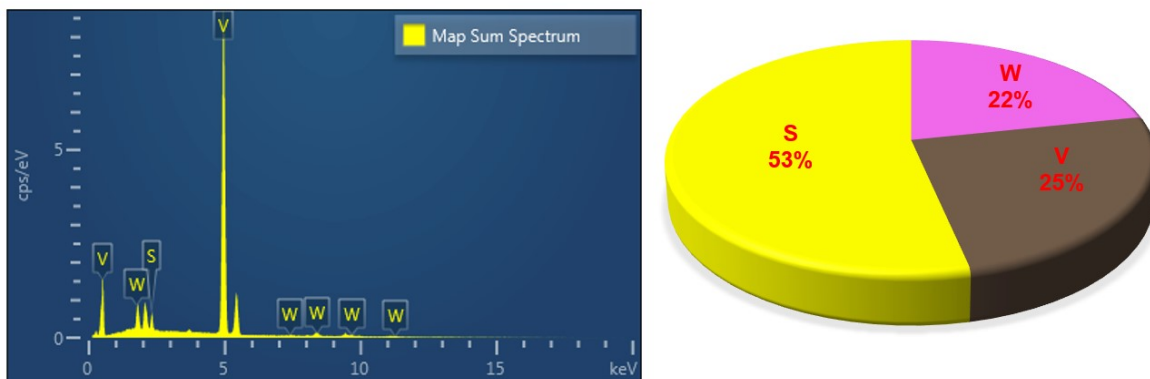

**Figure S4.** EDX profile of VW2 hybrid nanostructures.



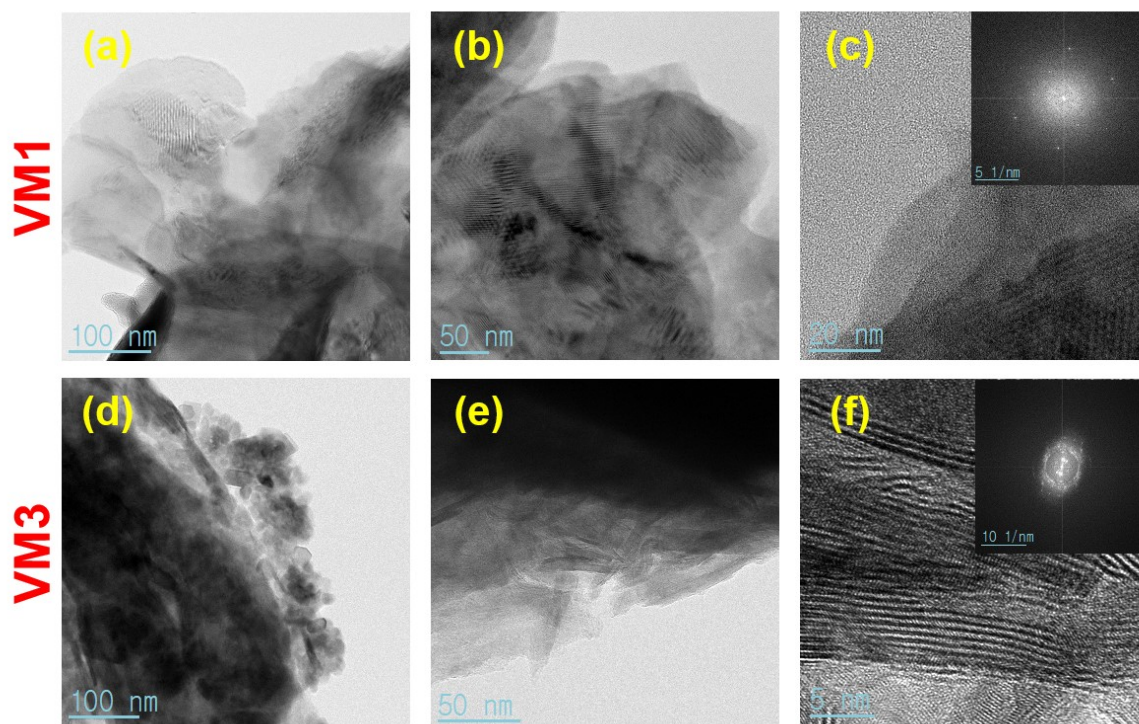

**Figure S5.** TEM micrographs of (a-c) VM1 and (d-f) VM3 nanostructures.



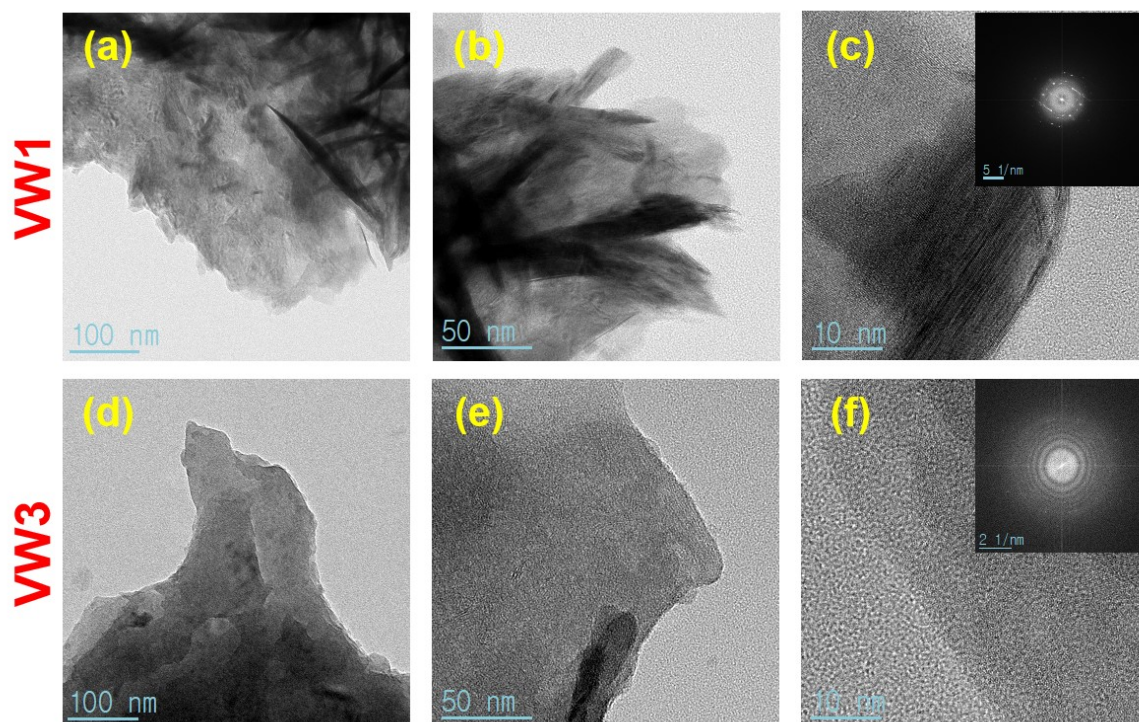

**Figure S6.** TEM micrographs of (a-c) VW1 and (d-f) VW3 nanostructures.

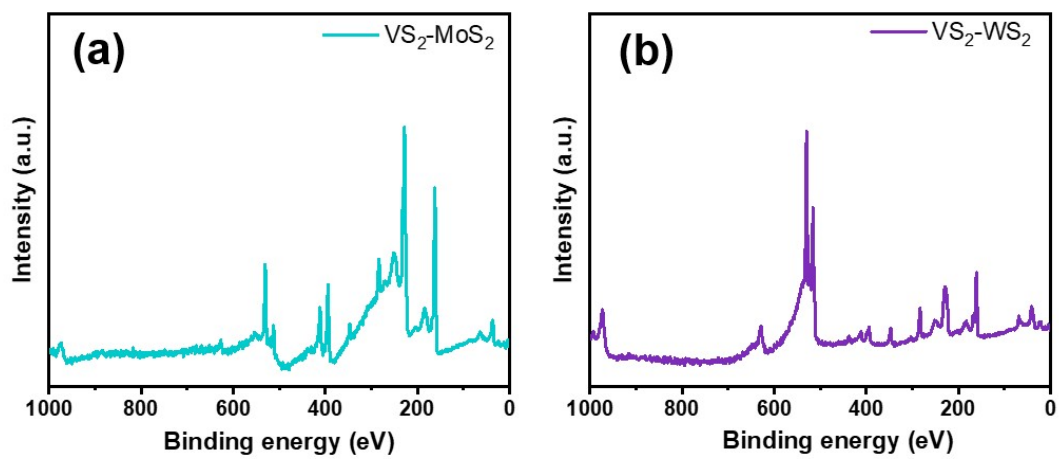

**Figure S7.** XPS survey spectra of (a) VM2 and (b) VW2 hybrid-structures.

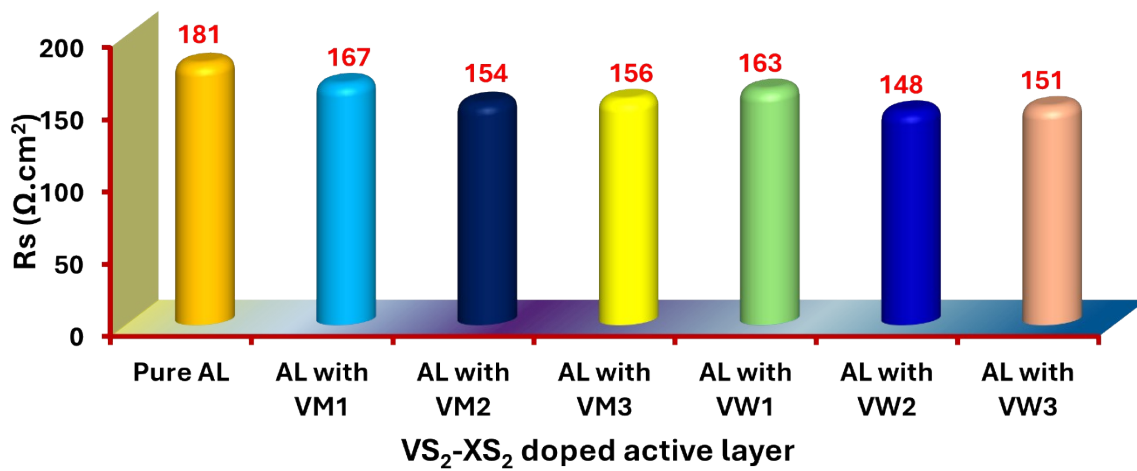

**Figure S8.** Resistivity of pure and VM1-, VM2-, VM3-, VW1-, VW2-, and VW3-doped Cs<sub>0.1</sub>MA<sub>0.9</sub>PbI<sub>3</sub> active layer composed device

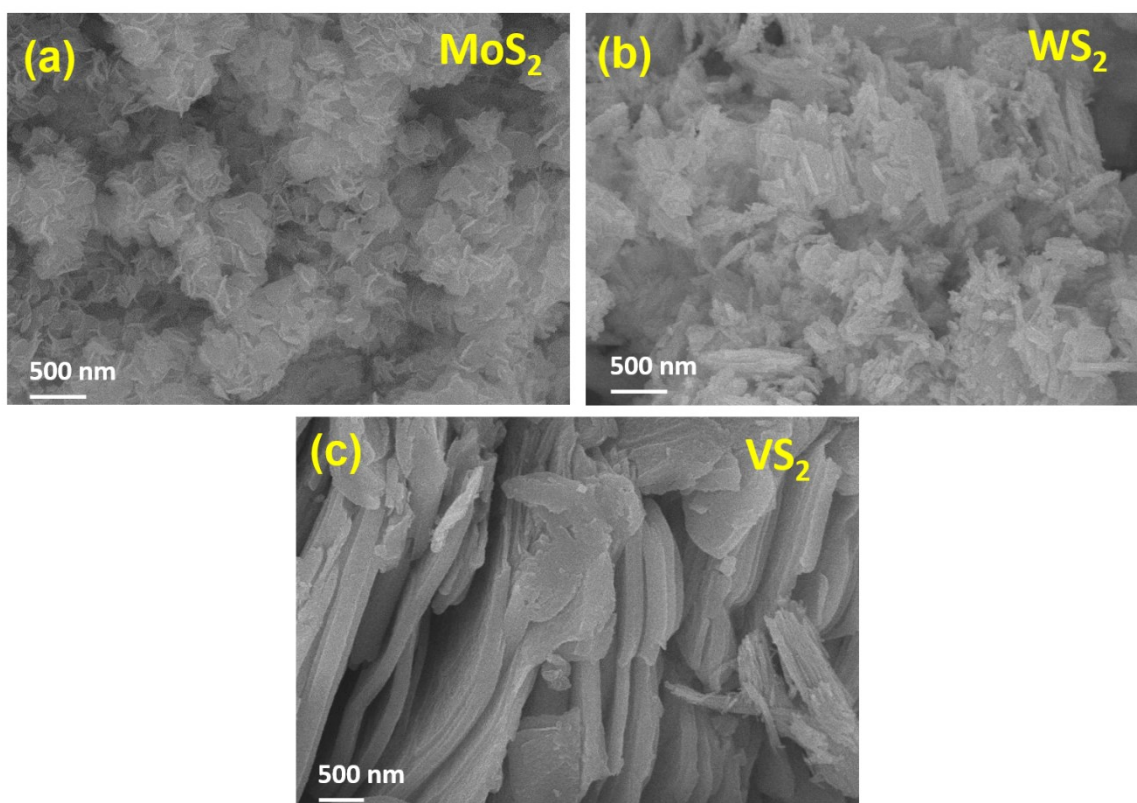

**Figure S9.** FESEM images of (a) MoS<sub>2</sub>, (b) VS<sub>2</sub> and (c) WS<sub>2</sub> nano-structures.



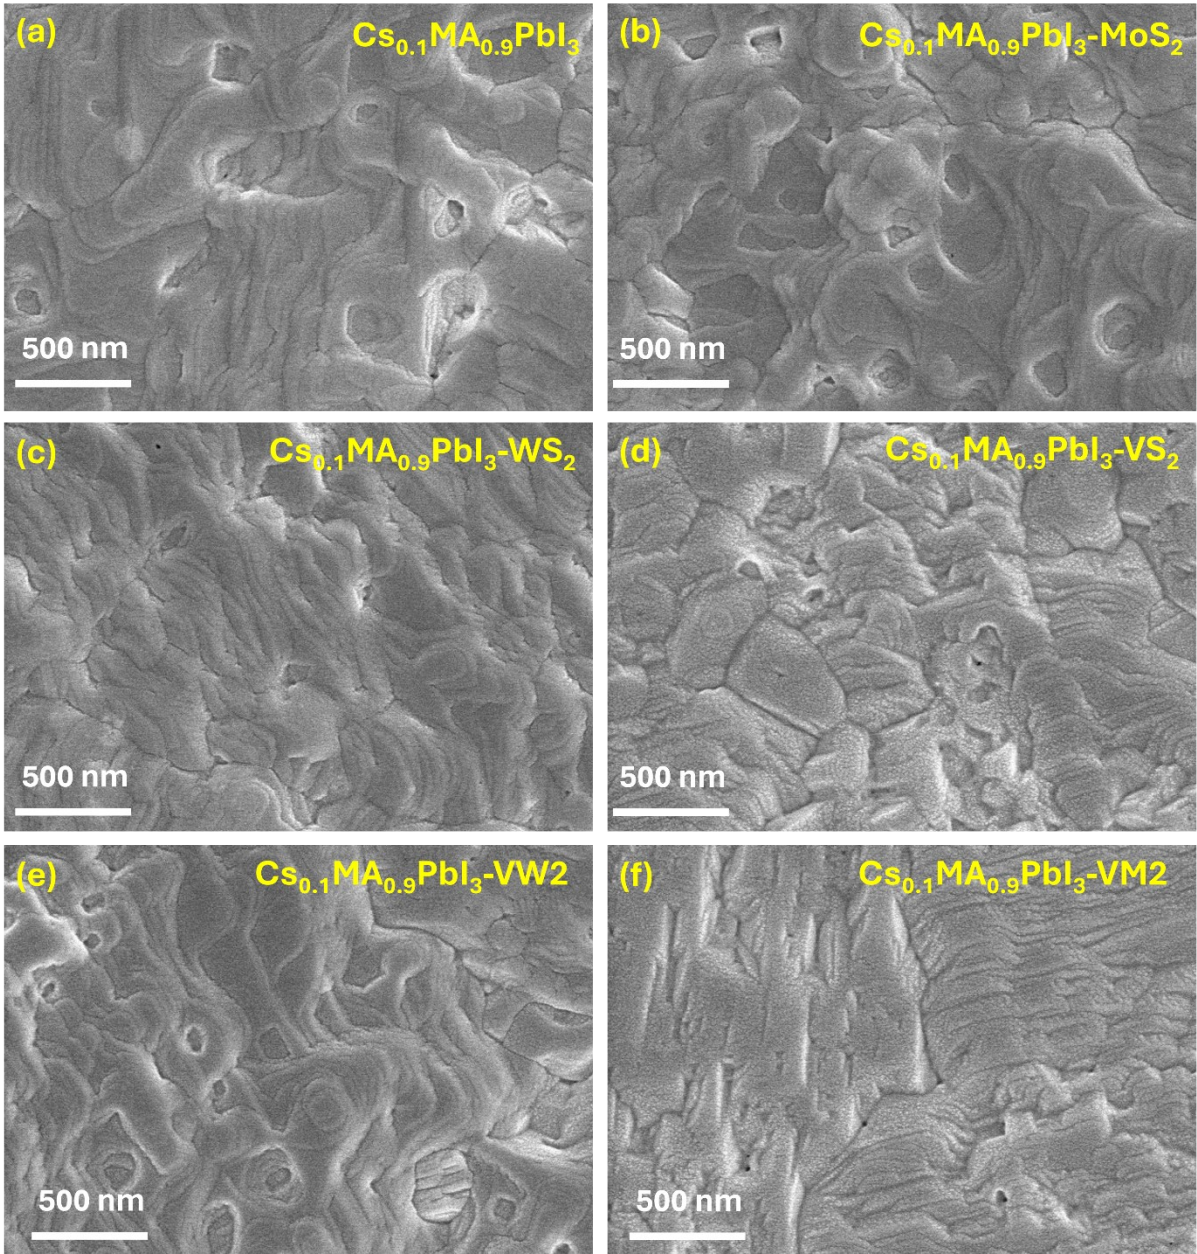

**Figure S10.** FESEM images of (a) pristine and  $\text{MoS}_2$ -,  $\text{WS}_2$ -,  $\text{VS}_2$ -,  $\text{VW}_2$ -, and  $\text{VM}_2$ -doped active layers

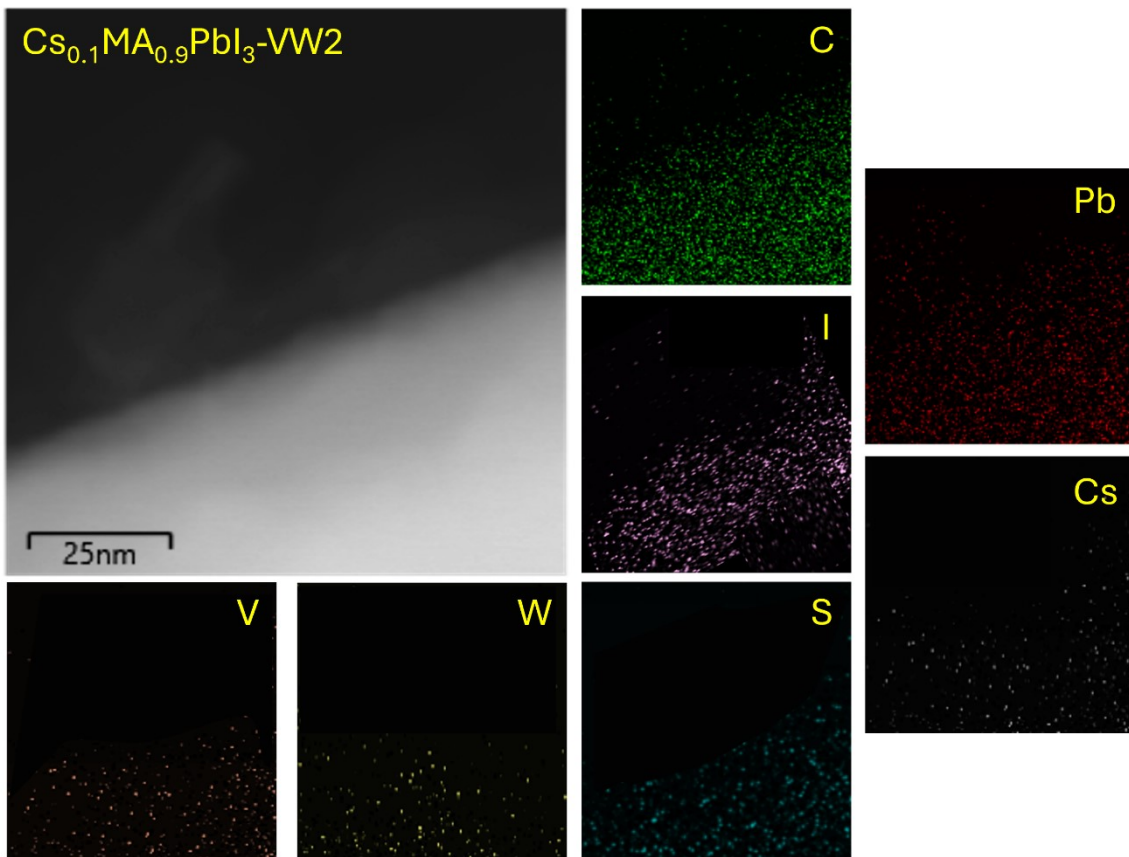

**Figure S11.** TEM elemental mapping distribution image of VW2-doped active layer and their C, I, V, W, S, Pb and Cs elements dispersion.

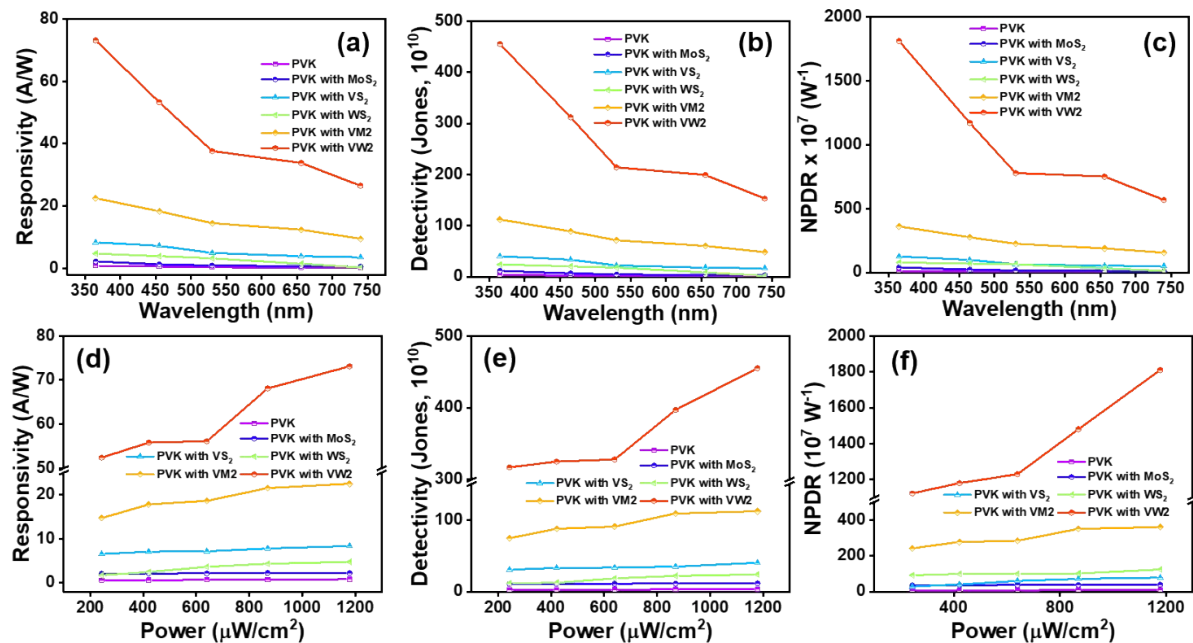

**Figure S12.** (a) Responsivity, (b) detectivity, and (c) NPDR variations under laser illumination of different wavelengths at a constant power of 1179  $\mu\text{W}/\text{cm}^2$ ; (d) responsivity, (e) detectivity, and (f) NPDR variations under illumination with different laser powers at a constant wavelength of 365 nm for the pristine and MoS<sub>2</sub>, VS<sub>2</sub>, WS<sub>2</sub>, VM2 VS<sub>2</sub>-MoS<sub>2</sub>, and VW2 VS<sub>2</sub>-WS<sub>2</sub>-doped perovskite layer.



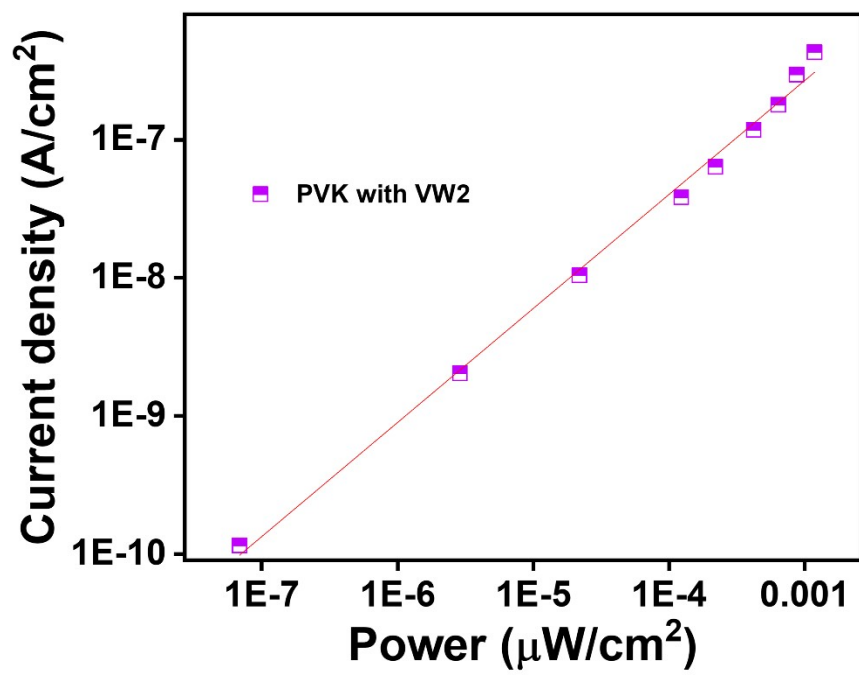

Figure S13. LDR profile of VW2 VS<sub>2</sub>–WS<sub>2</sub>-doped perovskite layer composed device.

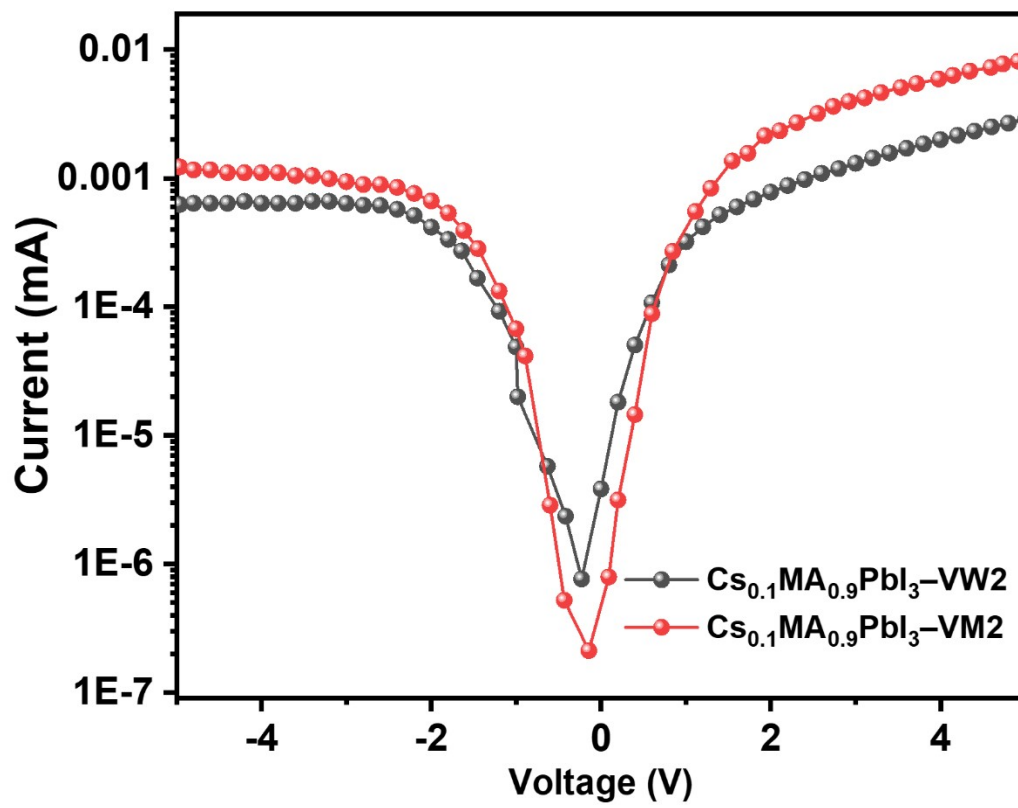

Figure S14. J-V profiles for the VW2 and VM2 doped perovskite layer photodetector

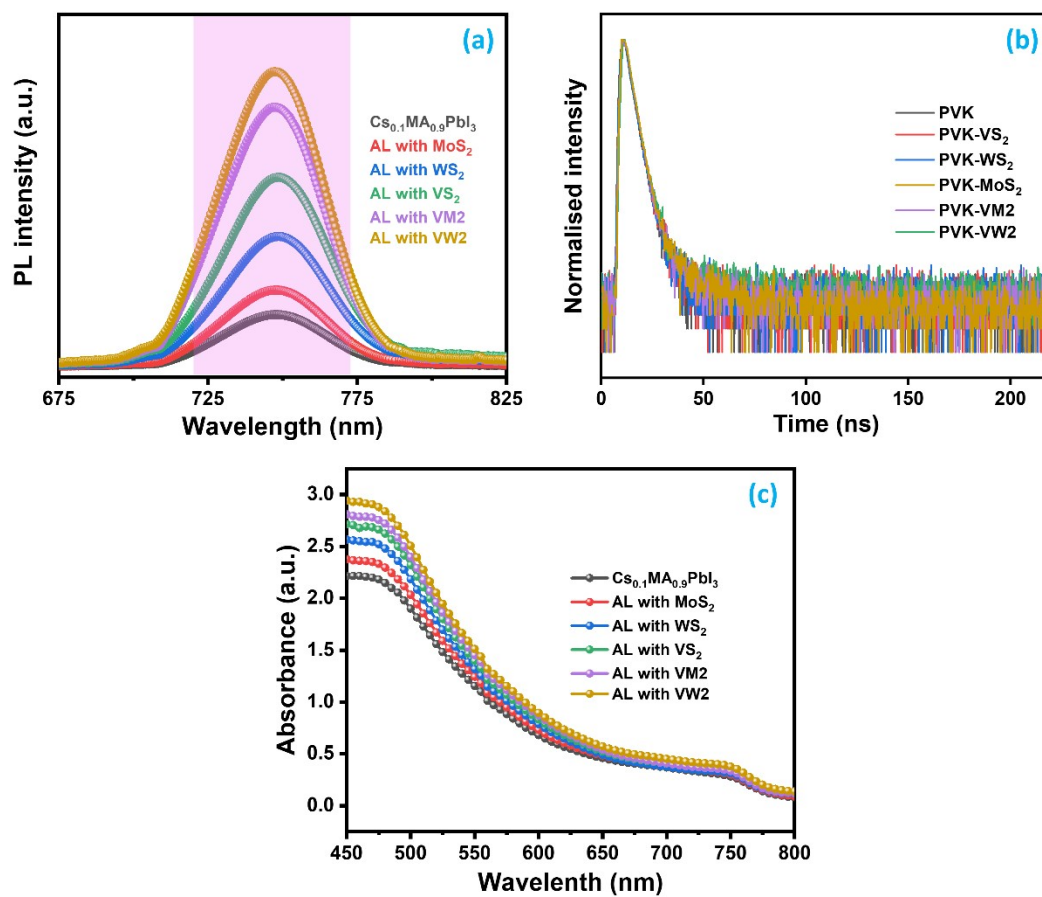

**Figure S15.** (a) PL, (b) TRPL and (c) UV-Vis-NIR absorption spectra for the  $\text{Cs}_{0.1}\text{MA}_{0.9}\text{PbI}_3$  doped with pristine and  $\text{MoS}_2$ ,  $\text{VS}_2$ ,  $\text{WS}_2$  and  $\text{VS}_2\text{-XS}_2$  hybrids.

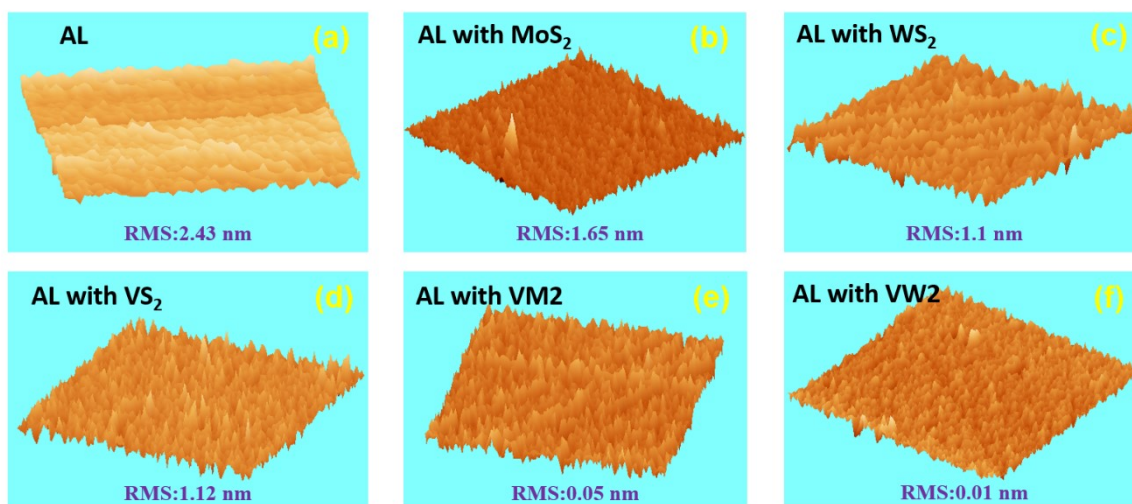

**Figure S16.** AFM images of (a) pure and (b) MoS<sub>2</sub>, (c) WS<sub>2</sub>, (d) VS<sub>2</sub>, (e) VM2, and (f) VW2 doped (10 vol.%) Cs<sub>0.1</sub>MA<sub>0.9</sub>PbI<sub>3</sub> perovskite layer.

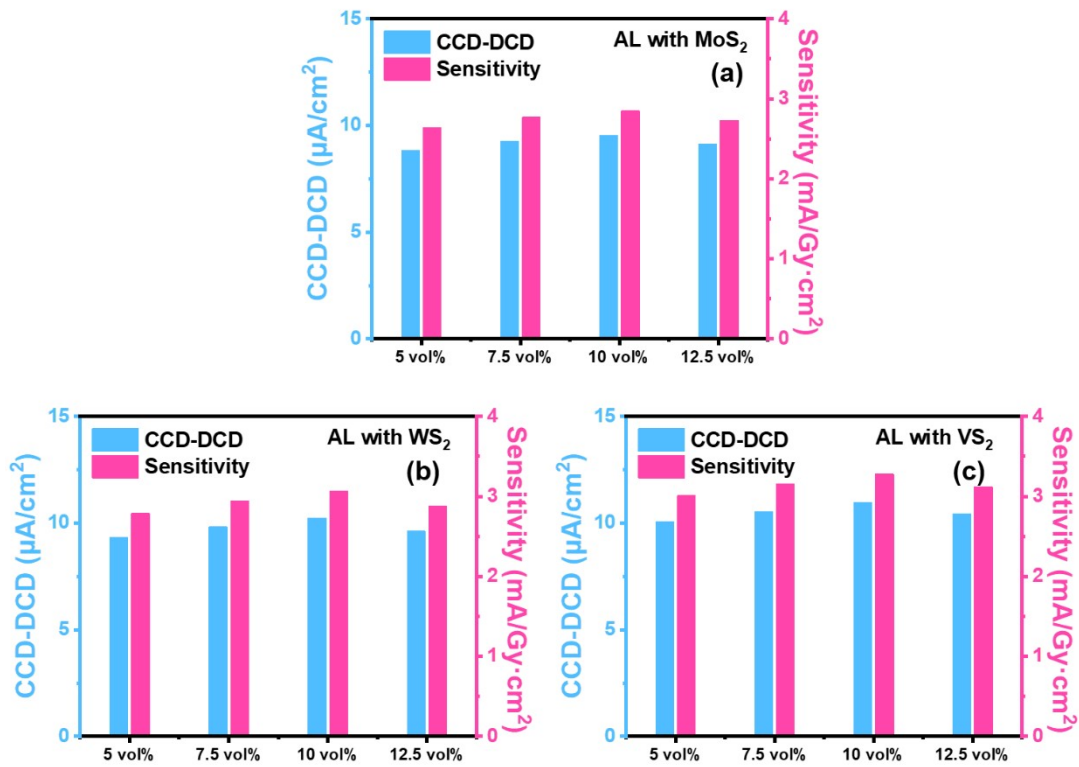

**Figure S17.** X-ray detector responses with different amount of (a) MoS<sub>2</sub>, (b) WS<sub>2</sub> and (c) VS<sub>2</sub> doped Cs<sub>0.1</sub>MA<sub>0.9</sub>PbI<sub>3</sub> perovskite layer.

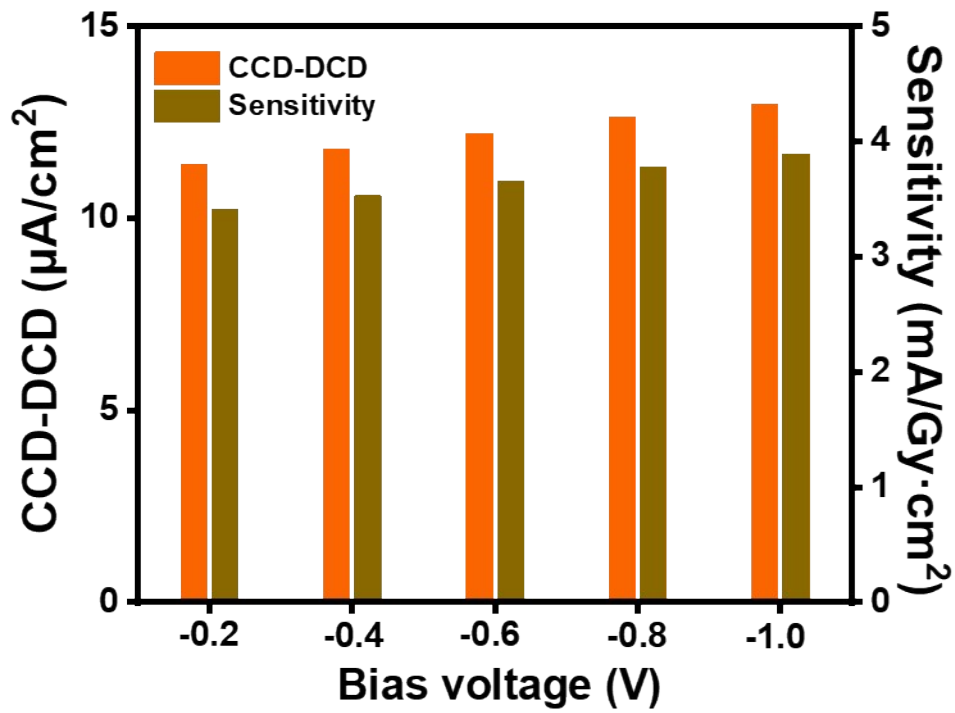

**Figure S18.** CCD-DCD and sensitivity variations of X-ray detectors prepared using  $\text{Cs}_{0.1}\text{MA}_{0.9}\text{PbI}_3$  active layer doped with VW2  $\text{VS}_2$ - $\text{WS}_2$  hybrids (10 vol.%) at different applied voltages.

**Table S1.** Device performance of various perovskite-based photodetectors

| Device module                                                                                                                                                        | Responsivity               | Rise/fall time  | Ref.             |
|----------------------------------------------------------------------------------------------------------------------------------------------------------------------|----------------------------|-----------------|------------------|
| <b>Cs<sub>0.1</sub>MA<sub>0.9</sub>PbI<sub>3</sub>-VS<sub>2</sub>-WS<sub>2</sub> VW2</b>                                                                             | <b>73.1 A/W</b>            | <b>4 / 3 ms</b> | <b>This work</b> |
| <b>Cs<sub>0.1</sub>MA<sub>0.9</sub>PbI<sub>3</sub>-VS<sub>2</sub>-MoS<sub>2</sub> VM2</b>                                                                            | <b>22.5 A/W</b>            | <b>7 / 6 ms</b> |                  |
| MAPbI <sub>3</sub>                                                                                                                                                   | 6.1 A/W                    | -               | 1                |
| CsPbBr <sub>3</sub> QDs/V-MoS <sub>2</sub> /Si                                                                                                                       | 0.975 A/W                  | 6.8/6.7 ms      | 2                |
| MAPbI <sub>3</sub> film/graphene                                                                                                                                     | 180 A/W                    | 0.087/0.54 s    | 3                |
| WSe <sub>2</sub> /ReSe <sub>2</sub>                                                                                                                                  | 0.3 A/W                    | 4.7/4.1 ms      | 4                |
| MAPbI <sub>3</sub> film/InGaZnO                                                                                                                                      | 0.025 A/W                  | 40/100 ms       | 5                |
| ML MoS <sub>2</sub> /(C <sub>6</sub> H <sub>5</sub> C <sub>2</sub> H <sub>4</sub> NH <sub>3</sub> ) <sub>2</sub> PbI <sub>4</sub>                                    | 16.8 A/W                   | 5100/10 000 ms  | 6                |
| MoTe <sub>2</sub> /InSe                                                                                                                                              | 0.015 A/W                  | 720/440 ms      | 7                |
| CH <sub>3</sub> NH <sub>3</sub> PbI <sub>3</sub> /WSe <sub>2</sub>                                                                                                   | 110 A/W                    | 2 s             | 8                |
| MAPbI <sub>3</sub> -MoS <sub>2</sub> nanoflakes BHJ film/rGO                                                                                                         | 1.08 × 10 <sup>4</sup> A/W | <0.045/<0.045s  | 9                |
| MAPbI <sub>3</sub> QDs/TiO <sub>2</sub> NTs                                                                                                                          | 1.3 A/W                    | 2000/1000 ms    | 10               |
| CH <sub>3</sub> NH <sub>3</sub> PbI <sub>3</sub> -WS <sub>2</sub> NCs/rGO                                                                                            | 678.8                      | < 60 or 780 ms  | 11               |
| MAPbI <sub>3</sub> film/MoS <sub>2</sub> /APTES                                                                                                                      | 2.11 × 10 <sup>4</sup> A/W | 6.17/4.5s       | 12               |
| CH <sub>3</sub> NH <sub>3</sub> PbI <sub>3</sub> /MoS <sub>2</sub>                                                                                                   | 0.6 A/W@0V                 | 2.15 s          | 13               |
| MAPbI <sub>3</sub> film/PDPP3T                                                                                                                                       | 0.154 A/W                  | 40/140 ms       | 14               |
| CH <sub>3</sub> NH <sub>3</sub> PbI <sub>3</sub> /WS <sub>2</sub>                                                                                                    | 17 A/W                     | 2.7 ms          | 15               |
| (C <sub>6</sub> H <sub>5</sub> C <sub>2</sub> H <sub>4</sub> NH <sub>3</sub> ) <sub>2</sub> SnI <sub>4</sub> -((PEA) <sub>2</sub> SnI <sub>4</sub> )/semi-CNT hybrid | 6.3 × 10 <sup>4</sup> A/W  | 825/440 ms      | 16               |
| CH <sub>3</sub> NH <sub>3</sub> PbI <sub>3</sub> /BP/MoS <sub>2</sub>                                                                                                | 11 A/W                     | 150/240 μs      | 17               |
| MAPbI <sub>3</sub> film/MoS <sub>2</sub>                                                                                                                             | 1.1 A/W                    | -               | 18               |
| CsPbI <sub>3-x</sub> Br <sub>x</sub> QDs/MoS <sub>2</sub>                                                                                                            | 7.7 × 10 <sup>4</sup> A/W  | 0.59/0.32       | 19               |
| Cs-doped FAPbI <sub>3</sub> /PdSe <sub>2</sub>                                                                                                                       | 313 × 10 <sup>-3</sup>     | 3.5/4 μs        | 20               |
| Graphene/(PEA) <sub>2</sub> SnI <sub>4</sub> /MoS <sub>2</sub> /graphene                                                                                             | 0.121 at 0V                | 34 ms           | 21               |
| Graphene/CH <sub>3</sub> NH <sub>3</sub> PbI <sub>3</sub> /WSe <sub>2</sub> /graphene                                                                                | 950@1V A/W                 | 22 ms           | 22               |
| FA <sub>0.85</sub> Cs <sub>0.15</sub> PbI <sub>3</sub> /PtSe <sub>2</sub>                                                                                            | 0.1@1V A/W                 | 78 ns           | 23               |
| Triple cation perovskites/MoS <sub>2</sub>                                                                                                                           | 342 A/W                    | 27/21 ms        | 24               |
| FA <sub>1-x</sub> Cs <sub>x</sub> PbI <sub>3</sub> /PtSe <sub>2</sub>                                                                                                | 313 m A/W                  | 3.5/4 μs        | 20               |
| FA <sub>0.85</sub> Cs <sub>0.15</sub> PbI <sub>3</sub> /DNTT hybrid                                                                                                  | 778 A/W                    | 1.1/2.0 ms      | 25               |
| Cs <sub>2</sub> AgBiBr <sub>6</sub> /SnO <sub>2</sub>                                                                                                                | 0.11 A/W                   |                 | 26               |
| MXene nanoparticles (MNPs)/MoS <sub>2</sub>                                                                                                                          | 20.67 A/W                  | 4.62/8.48s      | 27               |
| (CH <sub>3</sub> NH <sub>3</sub> ) <sub>3</sub> Bi <sub>2</sub> Br <sub>9</sub> /MoS <sub>2</sub>                                                                    | 112 A/W                    | 0.3/0.3 ms      | 28               |



**Table S2.** Rise and decay time of photodetector for pure and MoX<sub>2</sub> doped perovskite active layer

| <b>Mode</b>     | <b>PVK</b> | <b>PVK-MoS<sub>2</sub></b> | <b>PVK-WS<sub>2</sub></b> | <b>PVK-VS<sub>2</sub></b> | <b>PVK-VM2</b> | <b>PVK-VW2</b> |
|-----------------|------------|----------------------------|---------------------------|---------------------------|----------------|----------------|
| Rise Time (ms)  | 20         | 15                         | 11                        | 12                        | 7              | 4              |
| Decay Time (ms) | 19         | 15                         | 11                        | 11                        | 6              | 3              |

## References

1. N. Cho, F. Li, B. Turedi, L. Sinatra, S. P. Sarmah, M. R. Parida, M. I. Saidaminov, B. Murali, V. M. Burlakov and A. Goriely, *Nature communications*, 2016, **7**, 1-11.
2. L. Guo, Y. Gu, Z. Yang, S. Tian, X. San, J. Liu, L. Gao, S. Qiao and S. Wang, *Advanced Materials Interfaces*, 2021, **8**, 2002231.
3. Y. Lee, J. Kwon, E. Hwang, C. H. Ra, W. J. Yoo, J. H. Ahn, J. H. Park and J. H. Cho, *Advanced materials*, 2015, **27**, 41-46.
4. X. Tian and Y. Liu, *Journal of Semiconductors*, 2021, **42**, 032001.
5. X. Xu, L. Yan, T. Zou, R. Qiu, C. Liu, Q. Dai, J. Chen, S. Zhang and H. Zhou, *ACS applied materials & interfaces*, 2018, **10**, 44144-44151.
6. H. Wang, X. Wang, Y. Chen, S. Zhang, W. Jiang, X. Zhang, J. Qin, J. Wang, X. Li and Y. Pan, *Advanced Optical Materials*, 2020, **8**, 1901402.
7. Y. Sun, W. Gao, X. Li, C. Xia, H. Chen, L. Zhang, D. Luo, W. Fan, N. Huo and J. Li, *Journal of Materials Chemistry C*, 2021, **9**, 10372-10380.
8. J. Lu, A. Carvalho, H. Liu, S. X. Lim, A. H. Castro Neto and C. H. Sow, *Angewandte Chemie*, 2016, **128**, 12124-12128.
9. Z. Y. Peng, J. L. Xu, J. Y. Zhang, X. Gao and S. D. Wang, *Advanced Materials Interfaces*, 2018, **5**, 1800505.
10. Z. Zheng, F. Zhuge, Y. Wang, J. Zhang, L. Gan, X. Zhou, H. Li and T. Zhai, *Advanced Functional Materials*, 2017, **27**, 1703115.
11. D.-D. Zhang and R.-M. Yu, *Frontiers in chemistry*, 2019, **7**, 257.
12. D. H. Kang, S. R. Pae, J. Shim, G. Yoo, J. Jeon, J. W. Leem, J. S. Yu, S. Lee, B. Shin and J. H. Park, *Advanced Materials*, 2016, **28**, 7799-7806.
13. F. Bai, J. Qi, F. Li, Y. Fang, W. Han, H. Wu and Y. Zhang, *Advanced Materials Interfaces*, 2018, **5**, 1701275.
14. S. Chen, C. Teng, M. Zhang, Y. Li, D. Xie and G. Shi, *Advanced Materials*, 2016, **28**, 5969-5974.
15. C. Ma, Y. Shi, W. Hu, M. H. Chiu, Z. Liu, A. Bera, F. Li, H. Wang, L. J. Li and T. Wu, *Advanced Materials*, 2016, **28**, 3683-3689.
16. H. Zhu, A. Liu, H. L. Luque, H. Sun, D. Ji and Y.-Y. Noh, *ACS nano*, 2019, **13**, 3971-3981.
17. L. Wang, X. Zou, J. Lin, J. Jiang, Y. Liu, X. Liu, X. Zhao, Y. F. Liu, J. C. Ho and L. Liao,

- ACS nano*, 2019, **13**, 4804-4813.
18. Y. Park, S. Lee, H. J. Park, H. W. Baac, G. Yoo and J. Heo, *Journal of Nanoscience and Nanotechnology*, 2016, **16**, 11722-11726.
  19. H. Wu, H. Si, Z. Zhang, Z. Kang, P. Wu, L. Zhou, S. Zhang, Z. Zhang, Q. Liao and Y. Zhang, *Advanced Science*, 2018, **5**, 1801219.
  20. L. H. Zeng, Q. M. Chen, Z. X. Zhang, D. Wu, H. Yuan, Y. Y. Li, W. Qarony, S. P. Lau, L. B. Luo and Y. H. Tsang, *Advanced Science*, 2019, **6**, 1901134.
  21. C. Fang, H. Wang, Z. Shen, H. Shen, S. Wang, J. Ma, J. Wang, H. Luo and D. Li, *ACS applied materials & interfaces*, 2019, **11**, 8419-8427.
  22. H.-C. Cheng, G. Wang, D. Li, Q. He, A. Yin, Y. Liu, H. Wu, M. Ding, Y. Huang and X. Duan, *Nano letters*, 2016, **16**, 367-373.
  23. Z.-X. Zhang, L.-H. Zeng, X.-W. Tong, Y. Gao, C. Xie, Y. H. Tsang, L.-B. Luo and Y.-C. Wu, *The journal of physical chemistry letters*, 2018, **9**, 1185-1194.
  24. B. Sun, S. Xi, Z. Liu, X. Liu, Z. Wang, X. Tan, T. Shi, J. Zhou and G. Liao, *Applied Surface Science*, 2019, **493**, 389-395.
  25. L. B. Luo, G. A. Wu, Y. Gao, L. Liang, C. Xie, Z. X. Zhang, X. W. Tong, T. Wang and F. X. Liang, *Advanced Optical Materials*, 2019, **7**, 1900272.
  26. C. Wu, B. Du, W. Luo, Y. Liu, T. Li, D. Wang, X. Guo, H. Ting, Z. Fang and S. Wang, *Advanced Optical Materials*, 2018, **6**, 1800811.
  27. J. Zou, Y. Huang, W. Wang, C. Li, S. Wei, H. Liu, L. Luo, W. Du, K. Shen and A. Ren, *ACS Applied Materials & Interfaces*, 2022, **14**, 8243-8250.
  28. J. He, Y. Yang, Y. He, C. Ge, Y. Zhao, L. Gao and J. Tang, *ACS Photonics*, 2018, **5**, 1877-1884.
